# Supplementary material for: Prevalence and patient-reported outcomes of noncommunicable skin diseases among college students in China
Source: PubMed Central journal article supplement — JAAD Int. 2020 May 24;1(1):23–30. doi: 10.1016/j.jdin.2020.03.003 (PMC8361873; doi:10.1016/j.jdin.2020.03.003), 2020-05-24
Supplement: mmc1.pdf [file mmc1.pdf]

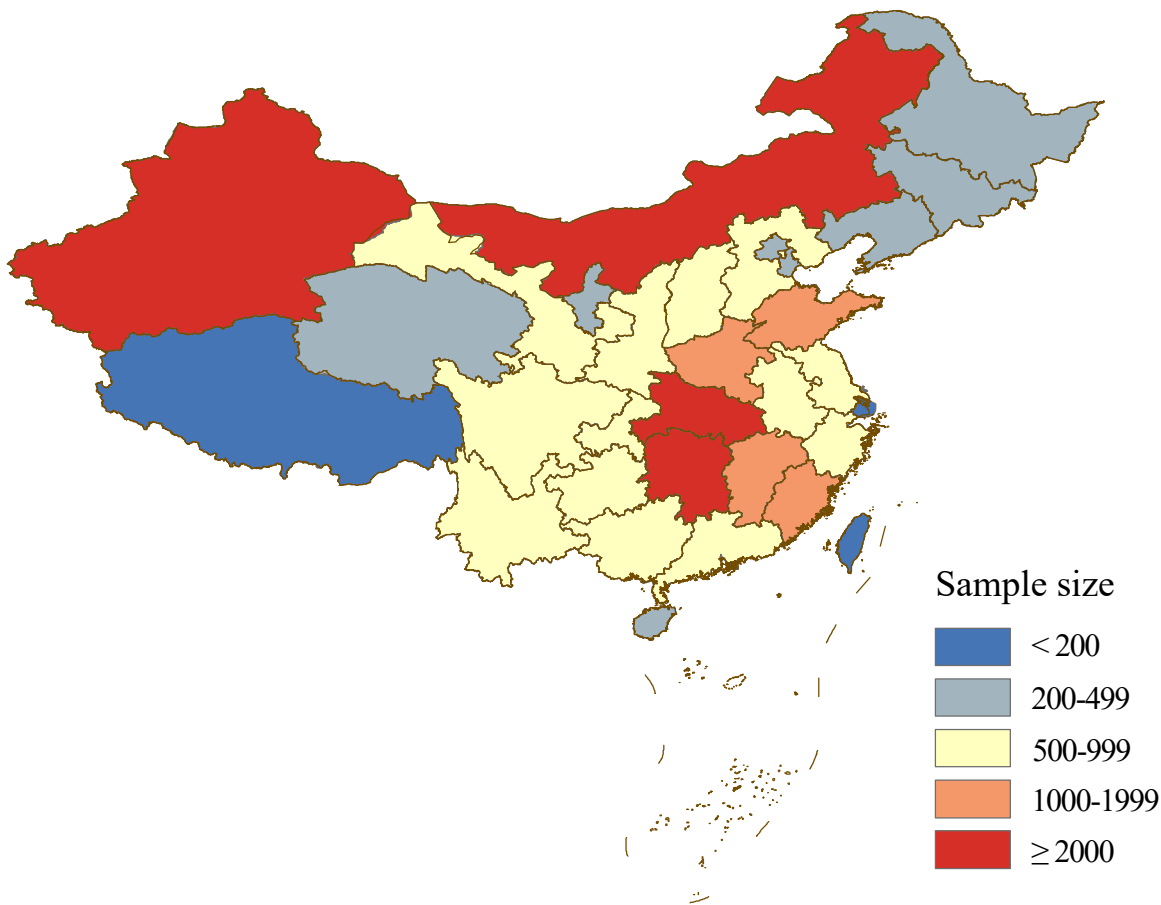

**Figure S1.** Geographic distribution of the college students' hometown provinces

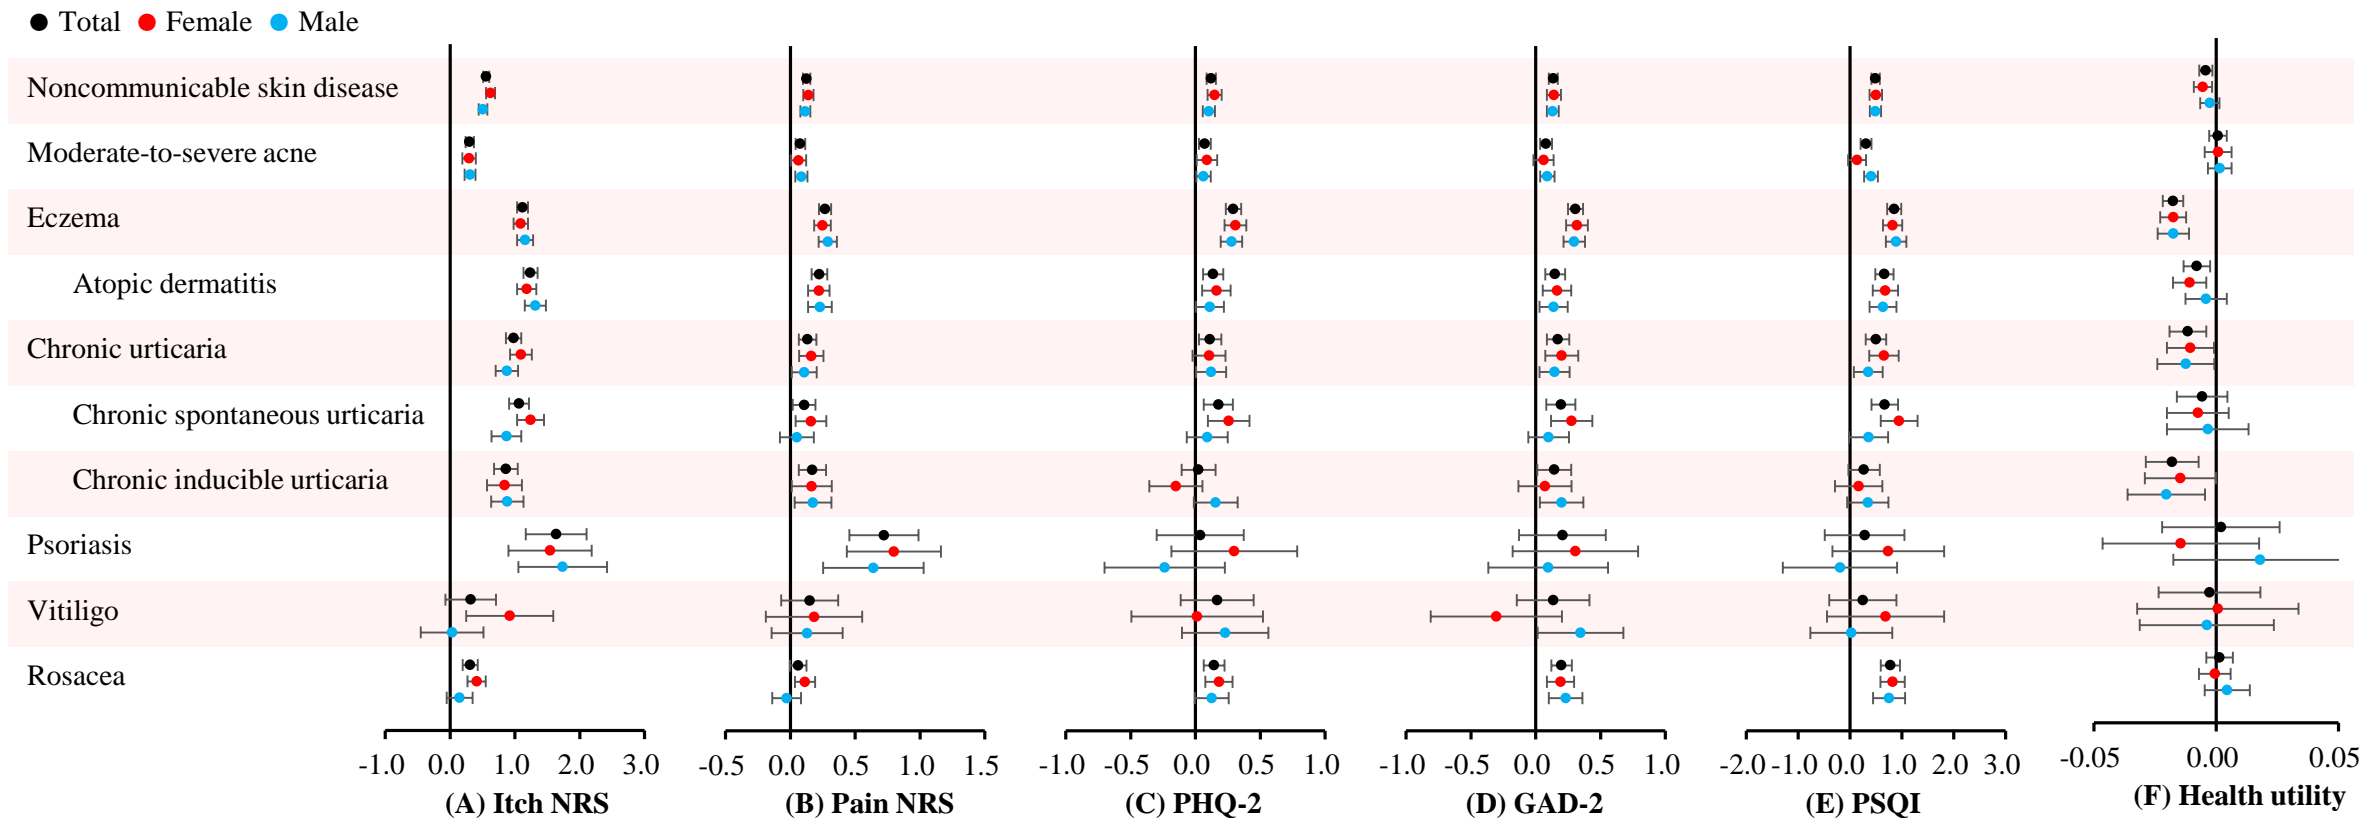

**Figure S2.** Adjusted mean differences of PRO scores of noncommunicable skin diseases compared to healthy controls. (A) Itch NRS; (B) pain NRS; (C) PHQ-2; (D) GAD-2; (E) PSQI; (F) health utility mapping from the EQ-5D-3L.

**Table S1. Adjusted mean differences of PRO scores in skin diseases compared to healthy controls using the mixed linear models**

| Group                         | Itch NRS    |          | Pain NRS    |          | PHQ-2       |          | GAD-2       |          | PSQI        |          | Health utility   |          |
|-------------------------------|-------------|----------|-------------|----------|-------------|----------|-------------|----------|-------------|----------|------------------|----------|
|                               | MD (SE)     | <i>P</i> | MD (SE)          | <i>P</i> |
| Noncommunicable skin diseases | 0.56 (0.02) | <0.001   | 0.13 (0.01) | <0.001   | 0.12 (0.02) | <0.001   | 0.14 (0.02) | <0.001   | 0.49 (0.04) | <0.001   | -0.0043 (0.0014) | 0.002    |
| Moderate-to-severe acne       | 0.30 (0.03) | <0.001   | 0.08 (0.02) | <0.001   | 0.07 (0.02) | 0.002    | 0.08 (0.02) | <0.001   | 0.31 (0.05) | <0.001   | 0.0007 (0.0018)  | 0.698    |
| Eczema                        | 1.12 (0.04) | <0.001   | 0.27 (0.02) | <0.001   | 0.29 (0.03) | <0.001   | 0.31 (0.03) | <0.001   | 0.85 (0.07) | <0.001   | -0.0177 (0.0021) | <0.001   |
| Atopic dermatitis             | 1.12 (0.05) | <0.001   | 0.22 (0.03) | <0.001   | 0.14 (0.04) | <0.001   | 0.15 (0.04) | <0.001   | 0.66 (0.09) | <0.001   | -0.0079 (0.0028) | 0.004    |
| Chronic urticaria             | 0.98 (0.06) | <0.001   | 0.13 (0.03) | <0.001   | 0.11 (0.04) | 0.011    | 0.17 (0.04) | <0.001   | 0.50 (0.10) | <0.001   | -0.0116 (0.0039) | 0.003    |
| Chronic spontaneous urticaria | 1.06 (0.08) | <0.001   | 0.11 (0.04) | 0.017    | 0.18 (0.06) | 0.002    | 0.19 (0.06) | <0.001   | 0.67 (0.13) | <0.001   | -0.0058 (0.0053) | 0.269    |
| Chronic inducible urticaria   | 0.86 (0.09) | <0.001   | 0.17 (0.05) | 0.001    | 0.02 (0.07) | 0.727    | 0.14 (0.07) | 0.032    | 0.27 (0.15) | 0.079    | -0.0180 (0.0055) | 0.001    |
| Psoriasis                     | 1.63 (0.24) | <0.001   | 0.72 (0.14) | <0.001   | 0.04 (0.17) | 0.829    | 0.21 (0.17) | 0.227    | 0.28 (0.39) | 0.476    | 0.0019 (0.0123)  | 0.877    |
| Vitiligo                      | 0.32 (0.20) | 0.113    | 0.15 (0.11) | 0.187    | 0.17 (0.14) | 0.246    | 0.13 (0.14) | 0.345    | 0.25 (0.33) | 0.456    | -0.0028 (0.0106) | 0.795    |
| Rosacea                       | 0.31 (0.06) | <0.001   | 0.06 (0.03) | 0.065    | 0.14 (0.04) | <0.001   | 0.20 (0.04) | <0.001   | 0.78 (0.09) | <0.001   | 0.0014 (0.0028)  | 0.624    |

NRS: numeric rating scale. PHQ: Patient Health Questionnaire. GAD: Generalized Anxiety Disorder. PSQI: Pittsburgh Sleep Quality Index. MD: mean difference. SE: standard error.

**Table S2. Adjusted odds ratios of PROs (dichotomous) in skin diseases compared to healthy controls using the mixed generalized linear model**

| Group                         | Itch (NRS $\geq$ 3) |                   |          | Pain (NRS $\geq$ 3) |                   |          | Depression (PHQ-2 $\geq$ 3) |                   |          | Anxiety (GAD-2 $\geq$ 3) |                   |          | Sleep disturbance (PSQI $\geq$ 6) |                   |          |
|-------------------------------|---------------------|-------------------|----------|---------------------|-------------------|----------|-----------------------------|-------------------|----------|--------------------------|-------------------|----------|-----------------------------------|-------------------|----------|
|                               | N (%)               | AOR (95% UI)      | <i>P</i> | N (%)               | AOR (95% UI)      | <i>P</i> | N (%)                       | AOR (95% UI)      | <i>P</i> | N (%)                    | AOR (95% UI)      | <i>P</i> | N (%)                             | AOR (95% UI)      | <i>P</i> |
| Healthy controls              | 1728 (11.8)         | Reference         |          | 367 (2.5)           | Reference         |          | 778 (5.3)                   | Reference         |          | 825 (5.6)                | Reference         |          | 3147 (21.5)                       | Reference         |          |
| Noncommunicable skin diseases | 1230 (22.1)         | 2.13 (1.98, 2.30) | <0.001   | 243 (4.4)           | 1.78 (1.52, 2.08) | <0.001   | 388 (7.0)                   | 1.30 (1.15, 1.46) | <0.001   | 417 (7.5)                | 1.33 (1.19, 1.49) | <0.001   | 1551 (27.9)                       | 1.43 (1.33, 1.53) | <0.001   |
| Moderate-to-severe acne       | 512 (17.6)          | 1.58 (1.42, 1.76) | <0.001   | 111 (3.8)           | 1.53 (1.24, 1.89) | <0.001   | 167 (5.8)                   | 1.15 (0.97, 1.36) | 0.120    | 171 (5.9)                | 1.13 (0.95, 1.34) | 0.1633   | 682 (23.5)                        | 1.20 (1.09, 1.32) | <0.001   |
| Eczema                        | 539 (32.8)          | 3.65 (3.31, 4.03) | <0.001   | 103 (6.3)           | 2.65 (2.20, 3.20) | <0.001   | 176 (10.7)                  | 1.83 (1.58, 2.11) | <0.001   | 183 (11.1)               | 1.81 (1.57, 2.09) | <0.001   | 622 (37.8)                        | 1.94 (1.76, 2.14) | <0.001   |
| Atopic dermatitis             | 331 (36.4)          | 4.29 (3.81, 4.82) | <0.001   | 51 (5.6)            | 2.35 (1.83, 3.00) | <0.001   | 68 (7.5)                    | 1.23 (0.97, 1.56) | 0.081    | 74 (8.1)                 | 1.26 (1.00, 1.58) | 0.0495   | 316 (34.7)                        | 1.70 (1.49, 1.94) | <0.001   |
| Chronic urticaria             | 214 (29.9)          | 3.20 (2.79, 3.68) | <0.001   | 32 (4.5)            | 1.82 (1.32, 2.52) | <0.001   | 52 (7.3)                    | 1.42 (1.09, 1.84) | 0.008    | 59 (8.2)                 | 1.56 (1.22, 1.99) | <0.001   | 204 (28.5)                        | 1.57 (1.34, 1.84) | <0.001   |
| Chronic spontaneous urticaria | 134 (32.4)          | 3.60 (3.04, 4.27) | <0.001   | 20 (4.8)            | 1.99 (1.35, 2.94) | <0.001   | 33 (8.0)                    | 1.50 (1.10, 2.06) | 0.012    | 33 (8.0)                 | 1.40 (1.00, 1.95) | 0.0517   | 130 (31.4)                        | 1.77 (1.45, 2.15) | <0.001   |
| Chronic inducible urticaria   | 80 (26.5)           | 2.71 (2.18, 3.36) | <0.001   | 12 (4.0)            | 1.60 (0.94, 2.74) | 0.083    | 19 (6.3)                    | 1.29 (0.84, 1.99) | 0.242    | 26 (8.6)                 | 1.80 (1.29, 2.51) | <0.001   | 74 (24.5)                         | 1.31 (1.01, 1.70) | 0.043    |
| Psoriasis                     | 19 (42.2)           | 5.87 (3.78, 9.11) | <0.001   | 6 (13.3)            | 5.99 (3.77, 9.50) | <0.001   | 3 (6.7)                     | 1.45 (0.54, 3.86) | 0.458    | 6 (13.3)                 | 2.38 (1.27, 4.46) | 0.0071   | 13 (28.9)                         | 1.42 (0.77, 2.61) | 0.258    |
| Vitiligo                      | 11 (17.2)           | 1.53 (0.82, 2.86) | 0.181    | 1 (1.6)             | 0.71 (0.07, 7.83) | 0.783    | 3 (4.7)                     | 0.89 (0.25, 3.16) | 0.857    | 5 (7.8)                  | 1.41 (0.63, 3.17) | 0.4077   | 14 (21.9)                         | 0.99 (0.53, 1.85) | 0.965    |
| Rosacea                       | 135 (15.9)          | 1.42 (1.17, 1.72) | <0.001   | 27 (3.2)            | 1.29 (0.86, 1.95) | 0.224    | 61 (7.2)                    | 1.36 (1.05, 1.76) | 0.020    | 70 (8.2)                 | 1.51 (1.20, 1.92) | <0.001   | 256 (30.1)                        | 1.61 (1.39, 1.86) | <0.001   |

NRS: numeric rating scale. PHQ: Patient Health Questionnaire. GAD: Generalized Anxiety Disorder. PSQI: Pittsburgh Sleep Quality Index. AOR: adjusted odds ratio. UI: uncertainty interval.
